# Supplementary material
Source: PubMed Central journal article supplement (PMC7797976)
Supplement: Supplemental_Tables_S1_and_S2.pdf [file Supplemental_Tables_S1_and_S2.pdf]

**Table S1.** Characteristics of the survey respondents, stratified by adequate PPE availability for HCWs and surgeons (n = 511)

|                                                                         |                               | Adequate PPE<br>No<br>n (%) | Adequate PPE<br>Yes<br>n (%) | p-value<br>(Chi-square) |
|-------------------------------------------------------------------------|-------------------------------|-----------------------------|------------------------------|-------------------------|
| Used guidelines<br>(n = 427) <sup>1</sup><br>Missing (n = 84, 16.4%)    | Hospital only                 | 25 (52.1) <sup>2</sup>      | 23 (47.9)                    |                         |
|                                                                         | Local government only         | 13 (59.1)                   | 9 (40.9)                     |                         |
|                                                                         | National association only     | 8 (53.3)                    | 7 (46.7)                     |                         |
|                                                                         | AO CMF only                   | 8 (88.9)                    | 1 (11.1)                     |                         |
|                                                                         | Dental association only       | 2 (40.0)                    | 3 (60.0)                     |                         |
|                                                                         | WHO only                      | 20 (80.0)                   | 5 (20.0)                     |                         |
|                                                                         | Two or more guidelines        | 164 (54.1)                  | 139 (45.9)                   | p = 0.083 <sup>3</sup>  |
| Region of Practice<br>(n = 441)<br>Missing (n = 70, 13.7%)              | Africa                        | <b>19 (79.2)</b>            | <b>5 (20.8)</b>              |                         |
|                                                                         | Asia                          | <b>67 (54.0)</b>            | <b>57 (26.4)</b>             |                         |
|                                                                         | Australia                     | <b>2 (40.0)</b>             | <b>3 (60.0)</b>              |                         |
|                                                                         | Europe                        | <b>61 (54.0)</b>            | <b>52 (24.3)</b>             |                         |
|                                                                         | Middle East                   | <b>11 (42.3)</b>            | <b>15 (57.7)</b>             |                         |
|                                                                         | North America                 | <b>24 (51.1)</b>            | <b>23 (48.9)</b>             |                         |
|                                                                         | South America                 | <b>68 (66.7)</b>            | <b>34 (33.3)</b>             | p = 0.041               |
| City population size<br>(n = 447)<br>Missing (n = 64, 12.5%)            | <100,000                      | 19 (52.8)                   | 17 (47.2)                    |                         |
|                                                                         | 100,000 – 500,000             | 49 (57.6)                   | 36 (42.4)                    |                         |
|                                                                         | 500,000 – 1,000,000           | 54 (62.1)                   | 33 (37.9)                    |                         |
|                                                                         | 1,000,000 – 2,000,000         | 42 (58.3)                   | 30 (41.7)                    |                         |
|                                                                         | >2,000,000                    | 92 (55.1)                   | 75 (44.9)                    | p = 0.83                |
| Maximal protection<br>(n = 434)<br>Missing (n = 77, 15.1%)              | Surgical and/or FFP1 masks    | <b>90 (76.9)</b>            | <b>27 (23.1)</b>             |                         |
|                                                                         | N95/FFP2 masks                | <b>103 (50.0)</b>           | <b>103 (50.0)</b>            |                         |
|                                                                         | FFP3 masks and/or PAPR system | <b>51 (45.9)</b>            | <b>60 (54.1)</b>             | p < 0.001               |
| Previous virus outbreak<br>(n = 427)<br>Missing (n = 84, 16.4%)         | None                          | 170 (59.9)                  | 114 (40.1)                   |                         |
|                                                                         | SARS                          | 8 (47.1)                    | 9 (52.9)                     |                         |
|                                                                         | Swine Flu                     | 49 (55.7)                   | 39 (44.3)                    |                         |
|                                                                         | Both                          | 17 (44.7)                   | 21 (55.3)                    | p = 0.26                |
| Positive test for COVID-19<br>(n = 448)<br>Missing (n = 63, 12.3%)      | Yes                           | 3 (60.0)                    | 2 (40.0)                     |                         |
|                                                                         | No                            | 254 (57.3)                  | 189 (42.7)                   | p = 0.91                |
| Performing elective CMF surgery<br>(n = 428)<br>Missing (n = 83, 16.2%) | Yes                           | 30 (52.6)                   | 27 (47.4)                    |                         |
|                                                                         | No                            | 216 (58.2)                  | 155 (42.5)                   | p = 0.43                |

<sup>1</sup>If data are missing, the number in the parentheses is the sample size for the variable under consideration.

<sup>2</sup>Percentages are based on the number of valid cases.

<sup>3</sup>Significantly different distributions are depicted in bold (the detail re statistical test goes in the methods section of the manuscript).

1

2

3

**Table S2.** Country of practice, stratified by adequate PPE availability for HCWs and surgeons (n = 448)

|                          |                             | Adequate PPE<br>No           | Adequate PPE<br>Yes | p-value<br>(Fisher's<br>exact test) |
|--------------------------|-----------------------------|------------------------------|---------------------|-------------------------------------|
|                          |                             | n (%)                        | n (%)               |                                     |
| Country of practice      | 1. United States of America | <b>18 (48.6)<sup>2</sup></b> | <b>19 (51.4)</b>    |                                     |
| (n = 272) <sup>1</sup>   | 2. Spain                    | <b>10 (76.9)</b>             | <b>3 (32.1)</b>     |                                     |
| Missing (n = 176, 39.3%) | 3. Italy                    | <b>8 (50.0)</b>              | <b>8 (50.0)</b>     |                                     |
|                          | 5. Germany                  | <b>9 (69.2)</b>              | <b>4 (30.8)</b>     |                                     |
|                          | 6. United Kingdom           | <b>7 (58.3)</b>              | <b>5 (41.7)</b>     |                                     |
|                          | 12. Brazil                  | <b>15 (60.0)</b>             | <b>10 (40.0)</b>    |                                     |
|                          | 18. India                   | <b>19 (46.3)</b>             | <b>22 (53.7)</b>    |                                     |
|                          | 21. Sweden                  | <b>3 (30.0)</b>              | <b>7 (70.0)</b>     |                                     |
|                          | 25. Chile                   | <b>9 (45.0)</b>              | <b>11 (55.0)</b>    |                                     |
|                          | 30. Pakistan                | <b>10 (71.4)</b>             | <b>4 (28.6)</b>     |                                     |
|                          | 35. Mexico                  | <b>10 (66.7)</b>             | <b>5 (33.3)</b>     |                                     |
|                          | 37. Philippines             | <b>10 (76.9)</b>             | <b>3 (23.1)</b>     |                                     |
|                          | 49. Colombia                | <b>11 (91.7)</b>             | <b>1 (8.30)</b>     |                                     |
|                          | 52. Argentina               | <b>11 (78.6)</b>             | <b>3 (21.4)</b>     |                                     |
|                          | 68. Hong Kong               | <b>6 (35.3)</b>              | <b>11 (64.7)*</b>   | <b>p = 0.036<sup>3</sup></b>        |

<sup>1</sup>If data are missing, the number in the parentheses is the sample size for the variable under consideration.

<sup>2</sup>Percentages are based on the number of valid cases.

<sup>3</sup>Significantly different distributions are depicted in bold (the detail re statistical test goes in the methods section of the manuscript).
